# Supplementary material
Source: PubMed Central journal article supplement (PMC4646409)
Supplement: supp_M115.676668_jbc.M115.676668-1.pdf [file supp_M115.676668_jbc.M115.676668-1.pdf]

**Supplemental Material for “Mitochondrial Iron-Sulfur-Cluster Activity and Cytosolic Iron Regulate Iron Traffic in *Saccharomyces cerevisiae*” by Wofford and Lindahl**

Table S1 Comparison between simulated values and literature data relevant to the model.

Unless otherwise indicated,  $[N] = 40 \mu\text{M}$  and  $\alpha = 0.2 \text{ hr}^{-1}$ . Residuals were calculated using the

function  $rmsd_{S1} = \frac{2|[S]_m - [D]_m|}{[S]_m + [D]_m}$ . Grey shading indicates experiments that are poorly simulated

( $rmsd_{S1} > 1.0$ ).

| Experimental Condition (Ref)            | Experimental Measurement                                         | Experimental Result                                                                                                                                                                            | Simulation Details                                                      | Simulation vs. Experiment                                                                                                                                                                                                                      |
|-----------------------------------------|------------------------------------------------------------------|------------------------------------------------------------------------------------------------------------------------------------------------------------------------------------------------|-------------------------------------------------------------------------|------------------------------------------------------------------------------------------------------------------------------------------------------------------------------------------------------------------------------------------------|
| WT at Fe-deficient, Fe-sufficient (14)  | FET3 expression                                                  | 4-5 $\uparrow$ at Fe-deficient vs. Fe sufficient                                                                                                                                               | $[\text{Fe}]_{\text{med}} = 4, 40$                                      | $S_1 = \frac{(\text{Reg}_{\text{C}} \cdot \text{Reg}_{\text{FS}} \cdot R_{\text{cyt}})_{N=4}}{(\text{Reg}_{\text{C}} \cdot \text{Reg}_{\text{FS}} \cdot R_{\text{cyt}})_{N=40}} = 1.6$<br>$D_1 = 4.5$<br>$rmsd_{S1} = 0.95$                    |
| <b><math>\Delta\text{Yfh1}</math></b>   |                                                                  |                                                                                                                                                                                                |                                                                         |                                                                                                                                                                                                                                                |
| $\Delta\text{Yfh1}$ (9, 20)             | Fermenting $[\text{Fe}]_{\text{mit}}$                            | 5-15 time higher than WT                                                                                                                                                                       | $R_{\text{isu}} = 15 \mu\text{M/hr}$<br>$\alpha = 0.07 \text{ hr}^{-1}$ | $S_2 = \left( \frac{[\text{Fe}_{\text{mit}}]_{\Delta\text{Yfh1}}}{[\text{Fe}_{\text{mit}}]_{\text{WT}}} \right)_{N=40} = 16$<br>$D_2 = 10$<br>$rmsd_{S1} = 0.46$                                                                               |
| $\Delta\text{Yfh1}$ (9)                 | mRNA levels of Mrs4                                              | Levels were ~ 2.5 times increased relative to WT                                                                                                                                               | $R_{\text{isu}} = 15 \mu\text{M/hr}$<br>$\alpha = 0.07 \text{ hr}^{-1}$ | $S_3 = \frac{(\text{Reg}_{\text{C}} \cdot \text{Reg}_{\text{FS}} \cdot R_{\text{mit}})_{\Delta\text{Yfh1}}}{(\text{Reg}_{\text{C}} \cdot \text{Reg}_{\text{FS}} \cdot R_{\text{mit}})_{\text{WT}}} = 1.8$<br>$D_3 = 2.5$<br>$rmsd_{S1} = 0.33$ |
| $\Delta\text{Yfh1}$ (9)                 | $[^{55}\text{Fe}_{\text{mit}}], [^{55}\text{Fe}_{\text{super}}]$ | Mitochondria from $\Delta\text{Yfh1}$ contained 40%-45% of cellular $^{55}\text{Fe}$ ; mitochondria from WT cells contained 5 – 10% of cellular $^{55}\text{Fe}$ . (Ratio is ca. 42/7.5 = 5.7) | $R_{\text{isu}} = 15 \mu\text{M/hr}$<br>$\alpha = 0.07 \text{ hr}^{-1}$ | $S_4 = \frac{([\text{Fe}_{\text{mit}}]/[\text{Fe}_{\text{cell}}])_{\Delta\text{Yfh1}}}{([\text{Fe}_{\text{mit}}]/[\text{Fe}_{\text{cell}}])_{\text{WT}}} = 8.2$<br>$D_4 = 5.7$<br>$rmsd_{S1} = 0.36$                                           |
| $\Delta\text{Yfh1}$ (9)                 | Aconitase and COX activities                                     | Aconitase activity was 41% of WT<br>COX activity was 74% of WT<br>Ave = 58%                                                                                                                    | $R_{\text{isu}} = 15 \mu\text{M/hr}$<br>$\alpha = 0.07 \text{ hr}^{-1}$ | $S_5 = \frac{[\text{FS}]_{\Delta\text{Yfh1}}}{[\text{FS}]_{\text{WT}}} = 0.52$<br>$D_5 = 0.58$<br>$rmsd_{S1} = 0.11$                                                                                                                           |
| Cu treatment to mimic ISC mutant (46)   | Mrs4 expression                                                  | 2.1 $\uparrow$ vs. WT                                                                                                                                                                          | $R_{\text{isu}} = 15 \mu\text{M/hr}$<br>$\alpha = 0.07 \text{ hr}^{-1}$ | $S_6 = \frac{(\text{Reg}_{\text{C}} \cdot \text{Reg}_{\text{FS}} \cdot R_{\text{mit}})_{\text{Cu}}}{(\text{Reg}_{\text{C}} \cdot \text{Reg}_{\text{FS}} \cdot R_{\text{mit}})_{\text{WT}}} = 1.8$<br>$D_6 = 2.1$<br>$rmsd_{S1} = 0.15$         |
| <b><math>\Delta\text{Mrs3/4}</math></b> |                                                                  |                                                                                                                                                                                                |                                                                         |                                                                                                                                                                                                                                                |

|                      |                                                                  |                                                                                                                                                                                                                          |                                                                  |                                                                                                                                                                                                                                            |
|----------------------|------------------------------------------------------------------|--------------------------------------------------------------------------------------------------------------------------------------------------------------------------------------------------------------------------|------------------------------------------------------------------|--------------------------------------------------------------------------------------------------------------------------------------------------------------------------------------------------------------------------------------------|
| $\Delta Mrs3/4$ (9)  | $[^{55}\text{Fe}_{\text{mit}}], [^{55}\text{Fe}_{\text{super}}]$ | Total cellular Fe was about 1.7 times that of WT cells.                                                                                                                                                                  | $R_{\text{mit}} = 180 \mu\text{M/hr}$                            | $S_7 = \frac{[Fe_{\text{cell}}]_{\Delta Mrs3/4}}{[Fe_{\text{cell}}]_{\text{WT}}} = .88$ $D_7 = 1.7$ $rmsd_{S1} = 0.64$                                                                                                                     |
| $\Delta Mrs3/4$ (9)  | $[Fe]_{\text{mit}}$                                              | Percentage of cellular iron in mito was 2.5% for $\Delta Mrs3/4$ and 4.0% for WT; the ratio was 0.62                                                                                                                     | $R_{\text{mit}} = 180 \mu\text{M/hr}$                            | $S_8 = \frac{([Fe_{\text{mit}}]/[Fe_{\text{cell}}])_{\Delta Mrs3/4}}{([Fe_{\text{mit}}]/[Fe_{\text{cell}}])_{\text{WT}}} = 1.0$ $D_8 = 0.62$ $rmsd_{S1} = 0.47$                                                                            |
| $\Delta Mrs3/4$ (9)  | Aconitase and COX activities                                     | Aconitase activity was 60% of WT<br>COX activity was 59% of WT<br>Ave = 60%                                                                                                                                              | $R_{\text{mit}} = 180 \mu\text{M/hr}$                            | $S_9 = \frac{[FS]_{\Delta Mrs3/4}}{[FS]_{\text{WT}}} = 0.82$ $D_9 = 0.60$ $rmsd_{S1} = 0.31$                                                                                                                                               |
| $\Delta Mrs3/4$ (10) | FET3 expression<br>FTR1 expression                               | FET3 = 2.2 $\uparrow$ vs. WT<br>FTR1 = 1.9 $\uparrow$ vs. WT<br>(microarray)                                                                                                                                             | $R_{\text{mit}} = 180 \mu\text{M/hr}$                            | $S_{10} = \frac{(\text{Reg}_{\text{c}} \cdot \text{Reg}_{\text{FS}} \cdot R_{\text{cyt}})_{\Delta Mrs3/4}}{(\text{Reg}_{\text{c}} \cdot \text{Reg}_{\text{FS}} \cdot R_{\text{cyt}})_{\text{WT}}} = .89$ $D_{10} = 2.0$ $rmsd_{S1} = 0.77$ |
| $\Delta Mrs3/4$ (10) | [hemes], [Bio2]<br>aconitase, SDH                                | Hemes: 1.4 $\downarrow$ vs. WT<br>(was 2-fold down in Fe-starved cells)<br>Bio2: 2.5 $\downarrow$ vs. WT<br>(was 1.7 fold lower in Fe-depleted mitos)<br>Aconitase unchanged<br>SDH unchanged<br>(Ave ca. 1.5 fold down) | $R_{\text{mit}} = 180 \mu\text{M/hr}$<br>$[Fe]_{\text{med}} = 4$ | $S_{11} = \left( \frac{[FS]_{\Delta Mrs3/4}}{[FS]_{\text{WT}}} \right)_{[Femed]=4} = 0.82$ $D_{11} = 0.67$ $rmsd_{S1} = 0.20$                                                                                                              |
| $\Delta Mrs3/4$ (10) | Aconitase and SDH activities                                     | In mito preparations, no significant differences in the activities of aconitase and SDH.                                                                                                                                 | $R_{\text{mit}} = 180 \mu\text{M/hr}$                            | $S_{12} = \left( \frac{[FS]_{\Delta Mrs3/4}}{[FS]_{\text{WT}}} \right)_{[Femed]=40} = 0.82$ $D_{12} = 1.0$ $rmsd_{S1} = 0.19$                                                                                                              |
| $\Delta Mrs3/4$ (10) | $[Fe]_{\text{mit}}$                                              | Mitochondria had 2.1 fold less Fe than WT mitochondria                                                                                                                                                                   | $R_{\text{mit}} = 180 \mu\text{M/hr}$<br>$[Fe]_{\text{med}} = 4$ | $S_{13} = \left( \frac{[Fe_{\text{mit}}]_{\Delta Mrs3/4}}{[Fe_{\text{mit}}]_{\text{WT}}} \right)_{[Femed]=4} = 0.89$ $D_{13} = 0.48$ $rmsd_{S1} = 0.59$                                                                                    |
| $\Delta Mrs3/4$ (10) | $[Fe]_{\text{mit}}$                                              | In mitochondria, no substantial changes in iron accumulation relative to WT; heme formation was similar to WT                                                                                                            | $R_{\text{mit}} = 180 \mu\text{M/hr}$                            | $S_{14} = \left( \frac{[Fe_{\text{mit}}]_{\Delta Mrs3/4}}{[Fe_{\text{mit}}]_{\text{WT}}} \right)_{[Femed]=40} = 0.89$ $D_{14} = 1.0$ $rmsd_{S1} = 0.12$                                                                                    |
| $\Delta Mrs3/4$ (36) | FET3, FRE1,<br>FTR1 expression                                   | FET3 = 4.7 $\uparrow$ vs. WT<br>FRE1 = 4.1 $\uparrow$ vs. WT<br>FTR1 = 3.5 $\uparrow$ vs. WT<br>Ave = 4.1                                                                                                                | $R_{\text{mit}} = 180 \mu\text{M/hr}$                            | $S_{15} = \frac{(\text{Reg}_{\text{c}} \cdot \text{Reg}_{\text{FS}} \cdot R_{\text{cyt}})_{\Delta Mrs3/4}}{(\text{Reg}_{\text{c}} \cdot \text{Reg}_{\text{FS}} \cdot R_{\text{cyt}})_{\text{WT}}} = 0.89$ $D_{15} = 4.1$ $rmsd_{S1} = 1.3$ |

|                                 |                                    |                                                                                                   |                                               |                                                                                                                                                            |
|---------------------------------|------------------------------------|---------------------------------------------------------------------------------------------------|-----------------------------------------------|------------------------------------------------------------------------------------------------------------------------------------------------------------|
| $\Delta Mrs3/4$ (36)            | $[Fe]_{cell}$                      | 2.8 $\uparrow$ vs. WT                                                                             | $R_{mit} = 180 \mu M/hr$                      | $S_{16} = \frac{[Fe_{cell}]_{\Delta Mrs3/4}}{[Fe_{cell}]_{WT}} = 0.89$ $D_{16} = 2.8$ $rmsd_{S1} = 1.0$                                                    |
| $\Delta Mrs3/4$ (36)            | $[Fe]_{vac}$                       | 4.0 $\uparrow$ vs. WT                                                                             | $R_{mit} = 180 \mu M/hr$                      | $S_{17} = \frac{[Fe_{vac}]_{\Delta Mrs3/4}}{[Fe_{vac}]_{WT}} = 0.84$ $D_{17} = 4.0$ $rmsd_{S1} = 1.3$                                                      |
| $\Delta Mrs3/4$ (36)            | FET3 expression<br>Iron uptake     | FET3: 8.0 $\uparrow$ vs. WT<br>Iron uptake: 14.8 times WT<br>Ave: 11.4                            | $R_{mit} = 180 \mu M/hr$                      | $S_{18} = \frac{(Reg_c \cdot Reg_{FS} \cdot R_{cyt})_{\Delta Mrs3/4}}{(Reg_c \cdot Reg_{FS} \cdot R_{cyt})_{WT}} = 0.89$ $D_{18} = 11.4$ $rmsd_{S1} = 1.7$ |
| $\Delta Mrs3/4$ (36)            | $[Fe]_{cell}$                      | 2.0 $\uparrow$ vs. WT                                                                             | $R_{mit} = 180 \mu M/hr$                      | $S_{19} = \frac{[Fe_{cell}]_{\Delta Mrs3/4}}{[Fe_{cell}]_{WT}} = 0.89$ $D_{19} = 2.0$ $rmsd_{S1} = 0.77$                                                   |
| $\Delta Mrs3/4$ (36)            | Aconitase activity                 | 0.25 times WT                                                                                     | $R_{mit} = 180 \mu M/hr$                      | $S_{20} = \frac{[FS]_{\Delta Mrs3/4}}{[FS]_{WT}} = 0.82$ $D_{20} = 0.25$ $rmsd_{S1} = 1.1$                                                                 |
| <b>MRS3/4 Overexpression</b>    |                                    |                                                                                                   |                                               |                                                                                                                                                            |
| MRS3/4-over (35)                | FET3 expression<br>FTR1 expression | FET3 = 2.8 $\uparrow$ vs. WT<br>FTR1 = 2.5 $\uparrow$ vs. WT<br>(microarray)                      | $R_{mit} = 2300 \mu M/hr$<br>$[Fe]_{med} = 4$ | $S_{21} = \frac{(Reg_c \cdot Reg_{FS} \cdot R_{cyt})_{MRS3/4over}}{(Reg_c \cdot Reg_{FS} \cdot R_{cyt})_{WT}} = 0.61$ $D_{21} = 2.6$ $rmsd_{S1} = 1.2$     |
| MRS3/4-over (35)                | [hemes], [ISC]<br>aconitase, SDH   | Hemes: 1.7 $\uparrow$ vs. WT<br>ISCs: 2 $\uparrow$ vs. WT<br>Aconitase unchanged<br>SDH unchanged | $R_{mit} = 2300 \mu M/hr$                     | $S_{22} = \left( \frac{[FS]_{MRS3/4over}}{[FS]_{WT}} \right)_{[Femed]=4} = 1.1$ $D_{22} = 1.8$ $rmsd_{S1} = 0.48$                                          |
| MRS3/4-over (35)                | $[Fe]_{mit}$                       | 2.5 $\uparrow$ vs. WT                                                                             | $R_{mit} = 2300 \mu M/hr$<br>$[Fe]_{med} = 4$ | $S_{23} = \left( \frac{[Fe_{mit}]_{MRS3/4over}}{[Fe_{mit}]_{WT}} \right)_{[Femed]=4} = 1.2$ $D_{23} = 2.5$ $rmsd_{S1} = 0.70$                              |
| MRS3/4-up (36)                  | $[Fe]_{cell}$                      | $[Fe]_{cell} = 40\%$ of WT                                                                        | $R_{mit} = 2300 \mu M/hr$                     | $S_{24} = \frac{[Fe_{cell}]_{MRS3/4UP}}{[Fe_{cell}]_{WT}} = 0.55$ $D_{24} = 0.40$ $rmsd_{S1} = 0.32$                                                       |
| <b><math>\Delta Ccc1</math></b> |                                    |                                                                                                   |                                               |                                                                                                                                                            |

|                                                                                           |                                    |                                                                                                                                                  |                                      |                                                                                                                                                                                               |
|-------------------------------------------------------------------------------------------|------------------------------------|--------------------------------------------------------------------------------------------------------------------------------------------------|--------------------------------------|-----------------------------------------------------------------------------------------------------------------------------------------------------------------------------------------------|
| $\Delta Ccc1$ (36)                                                                        | FET3 expression<br>Iron uptake     | FET3: 0.67 times WT<br>Iron uptake: 0.75 times WT<br>Ave: 0.7                                                                                    | $R_{vac} = 510 \mu\text{M/hr}$       | $S_{25} = \frac{(\text{Reg}_c \cdot \text{Reg}_{FS} \cdot R_{cell})_{\Delta CCC1}}{(\text{Reg}_c \cdot \text{Reg}_{FS} \cdot R_{cell})_{WT}} = 0.60$<br>$D_{25} = 0.70$<br>$rmsd_{S1} = 0.15$ |
| $\Delta Ccc1$ (36)                                                                        | $[\text{Fe}]_{cell}$               | 0.59 times WT                                                                                                                                    | $R_{vac} = 510 \mu\text{M/hr}$       | $S_{26} = \frac{[\text{Fe}_{cell}]_{\Delta CCC1}}{[\text{Fe}_{cell}]_{WT}} = 0.60$<br>$D_{26} = 0.59$<br>$rmsd_{S1} = 0.02$                                                                   |
| $\Delta Ccc1$ (36)                                                                        | Aconitase activity                 | 1.5 times WT                                                                                                                                     | $R_{vac} = 510 \mu\text{M/hr}$       | $S_{27} = \frac{[\text{FS}]_{\Delta CCC1}}{[\text{FS}]_{WT}} = 1.1$<br>$D_{27} = 1.5$<br>$rmsd_{S1} = 0.31$                                                                                   |
| $\Delta Ccc1$ (12)                                                                        | $[\text{Fe}_{vac}]$                | 27% of WT value                                                                                                                                  | $R_{vac} = 510 \mu\text{M/hr}$       | $S_{28} = \frac{[\text{Fe}_{vac}]_{\Delta CCC1}}{[\text{Fe}_{vac}]_{WT}} = 0.54$<br>$D_{28} = 0.27$<br>$rmsd_{S1} = 0.67$                                                                     |
| <b>Ccc1 overexpression</b>                                                                |                                    |                                                                                                                                                  |                                      |                                                                                                                                                                                               |
| Ccc1 over (12)                                                                            | $[\text{Fe}_{vac}]$                | 2.2 times greater than in WT vacuoles                                                                                                            | $R_{vac} = 20,000 \mu\text{M/hr}$    | $S_{29} = \frac{[\text{Fe}_{vac}]_{CCC1over}}{[\text{Fe}_{vac}]_{WT}} = 2.2$<br>$D_{29} = 2.2$<br>$rmsd_{S1} = 0.0$                                                                           |
| Ccc1 overexpression (12)                                                                  | Aconitase activity                 | Reduced relative to WT                                                                                                                           | $R_{vac} = 20,000 \mu\text{M/hr}$    | $S_{30} = \frac{[\text{FS}]_{CCC1over}}{[\text{FS}]_{WT}} = 0.79$<br>$D_{30} = 0.8$<br>$rmsd_{S1} = 0.01$                                                                                     |
| <b>Aft1/2-1<sup>UP</sup></b>                                                              |                                    |                                                                                                                                                  |                                      |                                                                                                                                                                                               |
| Aft1-1 <sup>UP</sup> (16)<br>Aft2-1 <sup>UP</sup><br>$\Delta\text{Aft1}\Delta\text{Aft2}$ | FET3 expression<br>FTR1 expression | FET3: (25.2+3.7) $\uparrow$ Up vs. $\Delta$<br>FTR1: (5+2.6) $\uparrow$ Up vs. $\Delta$<br>FRE1: (4+3.5) $\uparrow$ Up vs. $\Delta$<br>Ave = 7.3 | $[\text{Fe}]_{med} = 0.4$ and 10,000 | $S_{31} = \frac{(\text{Reg}_c \cdot \text{Reg}_{FS} \cdot R_{cyt})_{N=0.4}}{(\text{Reg}_c \cdot \text{Reg}_{FS} \cdot R_{cyt})_{N=10,000}} = 2.7$<br>$D_{31} = 7.3$<br>$rmsd_{S1} = 0.92$     |
| Aft1-1 <sup>UP</sup> (15)<br>Aft2-1 <sup>UP</sup><br>$\Delta\text{Aft1}\Delta\text{Aft2}$ | Mrs4 expression                    | 3.5 $\uparrow$ Up (ave) vs. $\Delta$                                                                                                             | $[\text{Fe}]_{med} = 0.4$ and 10,000 | $S_{32} = \frac{(\text{Reg}_c \cdot \text{Reg}_{FS} \cdot R_{mit})_{N=0.4}}{(\text{Reg}_c \cdot \text{Reg}_{FS} \cdot R_{mit})_{N=10,000}} = 2.0$<br>$D_{32} = 3.5$<br>$rmsd_{S1} = 0.55$     |
| Aft1-1 <sup>UP</sup> (15)<br>Aft2-1 <sup>UP</sup><br>$\Delta\text{Aft1}\Delta\text{Aft2}$ | FET5 expression<br>SMF3expression  | $\sim 2.6 \uparrow$ Up (ave) vs. $\Delta$ (Fet5)<br>$\sim 2 \uparrow$ Up (ave) vs. $\Delta$ (Smf3)                                               | $[\text{Fe}]_{med} = 0.4$ and 10,000 | $S_{33} = \frac{(\text{Reg}_c \cdot \text{Reg}_{FS} \cdot R_{vac})_{N=10,000}}{(\text{Reg}_c \cdot \text{Reg}_{FS} \cdot R_{vac})_{N=0.4}} = 574$<br>$D_{33} = 2.3$<br>$rmsd_{S1} = 1.9$      |
| <b><math>\Delta\text{Yfh1}\Delta\text{Mrs3/4}</math></b>                                  |                                    |                                                                                                                                                  |                                      |                                                                                                                                                                                               |

|                                                              |                                      |                                                                                      |                                                                                                              |                                                                                                                                                                              |
|--------------------------------------------------------------|--------------------------------------|--------------------------------------------------------------------------------------|--------------------------------------------------------------------------------------------------------------|------------------------------------------------------------------------------------------------------------------------------------------------------------------------------|
| $\Delta Yfh1\Delta Mrs3/4$ (9)                               | $[^{55}Fe_{mit}], [^{55}Fe_{super}]$ | Mitochondrial iron concentration is decreased to almost WT levels (Ratio is ca. 1.0) | $R_{isu} = 15 \mu M/hr$<br>$R_{mit} = 180 \mu M/hr$<br>$\alpha = 0.07 hr^{-1}$                               | $S_{34} = \frac{[Fe_{mit}]/[Fe_{cell}]_{\Delta Yfh1\Delta Mrs3/4}}{[Fe_{mit}]/[Fe_{cell}]_{WT}} = 7.1$<br>$D_{34} = 1.2$<br>$rmsd_{S1} = 1.4$                                |
| $\Delta Yfh1\Delta Mrs3/4$ (9)                               | $[^{55}Fe_{mit}], [^{55}Fe_{super}]$ | Mitochondrial iron concentration is 13% of cellular Fe.                              | $R_{isu} = 15 \mu M/hr$<br>$R_{mit} = 180 \mu M/hr$<br>$[Fe_{med}] = 10000 \mu M$<br>$\alpha = 0.07 hr^{-1}$ | $S_{35} = \frac{[Fe_{mit}]_{\Delta Yfh1\Delta Mrs3/4}}{[Fe_{cell}]_{\Delta Yfh1\Delta Mrs3/4}} = 0.83$<br>$D_{35} = 0.13$<br>$rmsd_{S1} = 1.5$                               |
| $\Delta Yfh1\Delta Mrs3/4$ (9)                               |                                      | Cellular Fe is about 3.5 times WT cellular iron level                                | $R_{isu} = 15 \mu M/hr$<br>$R_{mit} = 180 \mu M/hr$<br>$[Fe_{med}] = 10000 \mu M$<br>$\alpha = 0.07 hr^{-1}$ | $S_{36} = \frac{[Fe_{cell}]_{\Delta Yfh1\Delta Mrs3/4}}{[Fe_{cell}]_{\Delta Yfh1\Delta Mrs3/4}} = 0.49$<br>$D_{36} = 3.5$<br>$rmsd_{S1} = 1.5$                               |
| $\Delta Yfh1\Delta Mrs3/4$ (9)                               | Aconitase and COX activities         | Aconitase activity was 16% of WT<br>COX activity was 45% of WT<br>Ave = 30%          | $R_{isu} = 15 \mu M/hr$<br>$R_{mit} = 180 \mu M/hr$<br>$\alpha = 0.07 hr^{-1}$                               | $S_{37} = \frac{[FS]_{\Delta Yfh1\Delta Mrs3/4}}{[FS]_{WT}} = 0.06$<br>$D_{37} = 0.3$<br>$rmsd_{S1} = 1.3$                                                                   |
| <b><math>\Delta Yfh1</math>;<br/><math>MRS3/4over</math></b> |                                      |                                                                                      |                                                                                                              |                                                                                                                                                                              |
| $\Delta Yfh1;MRS3/4over$ (36)                                | $[Fe]_{mit}$                         | 2.5 $\uparrow$ vs. $\Delta Yfh1$                                                     | $R_{isu} = 15 \mu M/hr$<br>$R_{mit} = 4000 \mu M/hr$<br>$\alpha = 0.07 hr^{-1}$                              | $S_{38} = \frac{[Fe_{mit}]_{\Delta Yfh1-Mrs3/4UP}}{[Fe_{mit}]_{\Delta Yfh1}} = 2.3$<br>$D_{38} = 2.5$<br>$rmsd_{S1} = 0.08$                                                  |
| <b><math>\Delta Ccc1;\Delta Mrs3/4</math></b>                |                                      |                                                                                      |                                                                                                              |                                                                                                                                                                              |
| $\Delta Ccc1;\Delta Mrs3/4$ (36)                             | FET3, FRE1, FTR1 expression          | FET3: 0.978 vs. WT<br>FRE1: 1.374 vs. WT<br>FTR1: 0.834 vs. WT<br>Ave: 1.1           | $R_{vac} = 510 \mu M/hr$<br>$R_{mit} = 180 \mu M/hr$                                                         | $S_{39} = \frac{(Reg_c \cdot Reg_{FS} \cdot R_{cell})_{\Delta Ccc1\Delta Mrs3/4}}{(Reg_c \cdot Reg_{FS} \cdot R_{cell})_{WT}} = 0.24$<br>$D_{39} = 1.1$<br>$rmsd_{S1} = 1.3$ |
| $\Delta Ccc1;\Delta Mrs3/4$ (36)                             | FET3 expression<br>Iron uptake       | FET3: 4 times vs. WT<br>Iron uptake: 3.4 times vs. WT<br>Ave: 3.7 times vs. WT       | $R_{vac} = 510 \mu M/hr$<br>$R_{mit} = 180 \mu M/hr$                                                         | $S_{40} = \frac{(Reg_c \cdot Reg_{FS} \cdot R_{cell})_{\Delta Ccc1\Delta Mrs3/4}}{(Reg_c \cdot Reg_{FS} \cdot R_{cell})_{WT}} = 0.24$<br>$D_{40} = 3.7$<br>$rmsd_{S1} = 1.8$ |
| $\Delta Ccc1;\Delta Mrs3/4$ (36)                             | Whole cell iron                      | 1.6 times vs. WT                                                                     | $R_{vac} = 510 \mu M/hr$<br>$R_{mit} = 180 \mu M/hr$                                                         | $S_{41} = \frac{[Fe_{cell}]_{\Delta Yfh1\Delta Ccc1}}{[Fe_{cell}]_{WT}} = 0.46$<br>$D_{41} = 3.7$<br>$rmsd_{S1} = 1.6$                                                       |
| $\Delta Ccc1;\Delta Mrs3/4$ (36)                             | $[Fe_{vac}]$                         | 2 times vs. WT vacuoles                                                              | $R_{vac} = 510 \mu M/hr$<br>$R_{mit} = 180 \mu M/hr$                                                         | $S_{42} = \frac{[Fe_{vac}]_{\Delta Yfh1\Delta Ccc1}}{[Fe_{vac}]_{WT}} = 0.35$<br>$D_{42} = 2.0$<br>$rmsd_{S1} = 1.4$                                                         |

|                                     |                       |                   |                                                      |                                                                                                      |
|-------------------------------------|-----------------------|-------------------|------------------------------------------------------|------------------------------------------------------------------------------------------------------|
| $\Delta Ccc1;\Delta Mrs3/4$<br>(36) | Aconitase<br>activity | 0.81 times vs. WT | $R_{vac} = 510 \mu M/hr$<br>$R_{mit} = 180 \mu M/hr$ | $S_{43} = \frac{[FS]_{\Delta Yfh1\Delta Ccc1}}{[FS]_{WT}} = 0.84$ $D_{43} = 0.81$ $rmsd_{S1} = 0.04$ |
|-------------------------------------|-----------------------|-------------------|------------------------------------------------------|------------------------------------------------------------------------------------------------------|

Table S2 Data from previous Mössbauer-based studies. Data are from ref 6 and references

therein, except for data of ISC40 which are from ref 22. Concentrations are given in  $\mu\text{M}$ .

Residuals were calculated from the relationship 
$$rmsd_{S_2} = \frac{1}{6} \left( \sum_{j=FM,FS,MP,F3,VP,Fe^{II}} \frac{|[S]_j - [D]_j|}{[D]_{cell}} \right).$$

| Experiment        | [N]   | [C]   | [F2]   | [F3]             | [VP]            | [FM]           | [FS]           | [MP]             | [O2]  | [ROS]  | [Fe <sup>II</sup> ] | [Fe <sub>cell</sub> ] | rmsd <sub>S<sub>2</sub></sub> |
|-------------------|-------|-------|--------|------------------|-----------------|----------------|----------------|------------------|-------|--------|---------------------|-----------------------|-------------------------------|
| BPS               | 4     | 2.3 S | 130 S  | 450 S<br>1 D     | 44 S<br>1 D     | 98 S<br>34 D   | 170 S<br>330 D | 190 S<br>48 D    | 2.2 S | 190 S  | 44 S<br>56 D        | 200 S<br>150 D        | 0.95                          |
| WT1               | 7     | 2.6 S | 120 S  | 690 S<br>400 D   | 68 S<br>120 D   | 100 S<br>150 D | 180 S<br>550 D | 190 S<br>50 D    | 2.1 S | 190 S  | 42 S<br>60 D        | 270 S<br>250 D        | 0.61                          |
| WT10              | 16    | 3.0 S | 120 S  | 1000 S<br>1000 D | 98 S<br>1 D     | 110 S<br>150 D | 290 S<br>110 D | 190 S<br>310 D   | 2.0 S | 190 S  | 42 S<br>65 D        | 370 S<br>400 D        | 0.16                          |
| WT40              | 46    | 3.3 S | 110 S  | 1300 S<br>1200 D | 120 S<br>180 D  | 110 S<br>150 D | 200 S<br>210 D | 190 S<br>250 D   | 1.9 S | 190 S  | 42 S<br>44 D        | 410 S<br>440 D        | 0.10                          |
| WT100             | 110   | 3.4 S | 110 S  | 1400 S<br>1400 D | 140 S<br>80 D   | 120 S<br>170 D | 200 S<br>220 D | 190 S<br>190 D   | 1.8 S | 190 S  | 42 S<br>30 D        | 460 S<br>470 D        | 0.053                         |
| WT1000            | 1000  | 3.6 S | 110 S  | 1500 S<br>1400 D | 140 S<br>120 D  | 120 S<br>130 D | 200 S<br>220 D | 190 S<br>200 D   | 1.8 S | 190 S  | 42 S<br>26 D        | 490 S<br>460 D        | 0.046                         |
| WT10000           | 10000 | 3.6 S | 110 S  | 1500 S<br>1500 D | 150 S<br>140 D  | 120 S<br>110 D | 200 S<br>140 D | 190 S<br>200 D   | 1.8 S | 190 S  | 42 S<br>40 D        | 490 S<br>440 D        | 0.044                         |
| ISC40 (20)        | 46    | 32 S  | 57 S   | 7.2 S<br>0 D     | 17 S<br>0 D     | 800 S<br>370 D | 100 S<br>0 D   | 7000 S<br>7000 D | 3.7 S | 7000 S | 120 S<br>20 D       | 830 S<br>1000 D       | 0.11                          |
| ΔCcc1-1           | 7     | 3.0 S | 61 S   | 110 S<br>36 D    | 33 S<br>36 D    | 57 S<br>390 D  | 220 S<br>390 D | 84 S<br>240 D    | 1.6 S | 84 S   | 23 S<br>27 D        | 89 S<br>150 D         | 0.82                          |
| ΔCcc1-10          | 16    | 3.3 S | 93 S   | 180 S<br>210 D   | 53 S<br>40 D    | 58 S<br>340 D  | 230 S<br>340 D | 84 S<br>210 D    | 1.6 S | 84 S   | 31 S<br>54 D        | 120 S<br>210 D        | 0.47                          |
| ΔCcc1-20          | 26    | 3.5 S | 110 S  | 220 S<br>330 D   | 64 S<br>92 D    | 59 S<br>310 D  | 230 S<br>310 D | 84 S<br>190 D    | 1.6 S | 84 S   | 35 S<br>98 D        | 140 S<br>280 D        | 0.37                          |
| ΔCcc1-40          | 46    | 3.6 S | 120 S  | 250 S<br>460 D   | 74 S<br>240 D   | 59 S<br>320 D  | 230 S<br>320 D | 84 S<br>200 D    | 1.6 S | 84 S   | 39 S<br>110 D       | 180 S<br>360 D        | 0.42                          |
| CCC1-UP-1         | 7     | 1.7 S | 940 S  | 190 S<br>180 D   | 270 S<br>180 D  | 83 S<br>120 D  | 150 S<br>120 D | 190 S<br>74 D    | 2.6 S | 190 S  | 240 S<br>130 D      | 400 S<br>250 D        | 0.27                          |
| CCC1-UP-10        | 16    | 1.9 S | 1400 S | 350 S<br>370 D   | 500 S<br>520 D  | 88 S<br>140 D  | 160 S<br>140 D | 190 S<br>87 D    | 2.4 S | 190 S  | 350 S<br>300 D      | 600 S<br>560 D        | 0.079                         |
| CCC1-UP-20        | 26    | 2.0 S | 1600 S | 430 S<br>610 D   | 620 S<br>1400 D | 90 S<br>270 D  | 160 S<br>270 D | 190 S<br>170 D   | 2.4 S | 190 S  | 400 S<br>410 D      | 700 S<br>980 D        | 0.22                          |
| CCC1-UP-40        | 46    | 2.0 S | 1800 S | 520 S<br>1500 D  | 740 S<br>2100 D | 92 S<br>440 D  | 160 S<br>440 D | 190 S<br>270 D   | 2.3 S | 190 S  | 450 S<br>830 D      | 800 S<br>1800 D       | 0.31                          |
| CCC1-UP-1+adenine | 7     | 1.9 S | 53 S   | 600 S<br>160 D   | 660 S<br>170 D  | 88 S<br>130 D  | 160 S<br>130 D | 190 S<br>80 D    | 2.4 S | 190 S  | 2 S<br>270 D        | 370 S<br>380 D        | 0.59                          |
| CCC1-UP-          | 46    | 2.6 S | 16 S   | 1000 S           | 1100 S          | 100 S          | 180 S          | 190 S            | 2.0 S | 190 S  | 16 S                | 600 S                 | 0.21                          |

|            |  |  |  |        |        |       |       |       |  |  |       |        |  |
|------------|--|--|--|--------|--------|-------|-------|-------|--|--|-------|--------|--|
| 40+adenine |  |  |  | 1900 D | 1200 D | 230 D | 230 D | 140 D |  |  | 190 D | 1000 D |  |
|------------|--|--|--|--------|--------|-------|-------|-------|--|--|-------|--------|--|



Table S3: Optimized Parameters and sensitivities. \* means nearly optimized.

| Parameter                                     | Optimized Value | Unit                             | Sensitivity |
|-----------------------------------------------|-----------------|----------------------------------|-------------|
| $R_{mit}$                                     | 900             | $\mu\text{M}\cdot\text{hr}^{-1}$ | 1.15        |
| $R_{mit}(\Delta\text{Mrs3/4})$                | 180             | "                                | 1.00        |
| $R_{mit}(\text{Mrs3/4-UP})$                   | 2300            | "                                | 1.00        |
| $R_{mit}(\Delta\text{Yfh1};\text{Mrs3/4-UP})$ | 4000*           | "                                | 1.04        |
|                                               |                 |                                  |             |
| $k_{O_2}$                                     | 52              | $\text{hr}^{-1}$                 | 1.08        |
| $k_{res}$                                     | 150             | $\text{hr}^{-1}$                 | 1.07        |
| $k_{mp}$                                      | 0.18            | $\mu\text{M}^{-1}\text{hr}^{-1}$ | 1.06        |
|                                               |                 |                                  |             |
| $K_{mit}$                                     | 12              | $\mu\text{M}$                    | 1.08        |
| $K_{O_2}$                                     | 9               | "                                | 1.07        |
| $K_{isu}$                                     | 610             | "                                | 1.07        |
| $K_{cyt}$                                     | 14              | "                                | 1.00        |
| $K_{vac}$                                     | 5.5             | "                                | 1.00        |
|                                               |                 |                                  |             |
| $[FS]_{spcyt}$                                | 190             | $\mu\text{M}$                    | 1.08        |
| $[FS]_{spmit}$                                | 200             | "                                | 1.09        |
| $[FS]_{spvac}$                                | 190             | "                                | 1.02        |
| $[FS]_{spvac}(\Delta\text{Ccc1})$             | 170*            | "                                | 1.00        |
| $[FS]_{spvac}(\text{CCC1-UP})$                | 170             | "                                | 1.00        |
| $[FS]_{spvac}(\text{UP+Ad})$                  | 140             | "                                | 1.01        |
| $[FS]_{sp23}$                                 | 210             | "                                | 1.00        |
| $[FS]_{sp23}(\Delta\text{Ccc1})$              | 110             | "                                | 1.00        |
| $[FS]_{sp23}(\text{CCC1-UP})$                 | 150             | "                                | 1.00        |
| $[FS]_{sp23}(\text{CCC1-UP+Ad})$              | 190             | "                                | 1.01        |
|                                               |                 |                                  |             |
| $[C]_{spcyt}$                                 | 27              | $\mu\text{M}$                    | 1.05        |
| $[C]_{spmit}$                                 | 80*             | "                                | 1.00        |
| $[C]_{spvac}$                                 | 1.2             | "                                | 1.00        |
| $[C]_{spvac}(\Delta\text{Ccc1})$              | 4.2             | "                                | 1.00        |
| $[C]_{spvac}(\text{CCC1-UP})$                 | 0.2             | "                                | 1.00        |
| $[C]_{spvac}(\text{CCC1-UP+Ad})$              | 0.5*            | "                                | 1.00        |
| $[C]_{sp23}$                                  | 2               | "                                | 1.02        |
| $[C]_{sp23}(\Delta\text{Ccc1})$               | 2.3             | "                                | 1.00        |
| $[C]_{sp23}(\text{CCC1-UP})$                  | 0.14            | "                                | 1.00        |
| $[C]_{sp23}(\text{CCC1-UP+Ad})$               | 2               | "                                | 1.05        |
|                                               |                 |                                  |             |
| $f_{ssenmit}$                                 | 4               | none                             | 1.03        |
| $f_{ssencyt}$                                 | 9               | "                                | 1.00        |
| $f_{ssenvac}$                                 | 8               | "                                | 1.00        |
| $f_{ssenvac}(\Delta\text{Ccc1})$              | 7               | "                                | 1.00        |
| $f_{ssenvac}(\text{CCC1-up})$                 | 10              | "                                | 1.00        |
| $f_{ssenvac}(\text{UP+Ad})$                   | 10              | "                                | 1.00        |
| $f_{ssen23}$                                  | 10              | "                                | 1.00        |
| $f_{ssen23}(\Delta\text{CCC1})$               | 10              | "                                | 1.00        |
| $f_{ssens23}(\text{CCC1-UP})$                 | 10              | "                                | 1.00        |
| $f_{ssens23}(\text{UP+Ad})$                   | 7               | "                                | 1.01        |
|                                               |                 |                                  |             |
| $c_{senmit}$                                  | 5               | none                             | 1.00        |
| $c_{senct}$                                   | 5               | "                                | 1.00        |
| $c_{senvac}$                                  | 3               | "                                | 1.00        |
| $c_{senvac}(\Delta\text{Ccc1})$               | 5               | "                                | 1.00        |
| $c_{senvac}(\text{CCC1-up})$                  | 4               | "                                | 1.00        |
| $c_{senvac}(\text{UP+Ad})$                    | 4               | "                                | 1.00        |

|                           |                                       |                                  |              |
|---------------------------|---------------------------------------|----------------------------------|--------------|
| <i>csen23</i>             | 10                                    | "                                | 1.00         |
| <i>csen23(ΔCCCI)</i>      | 2                                     | "                                | 1.00         |
| <i>csens23(CCCI-UP)</i>   | 5                                     | "                                | 1.00         |
| <i>csens23(UP+Ad)</i>     | 10                                    | "                                | 1.01         |
|                           |                                       |                                  |              |
| $R_{vac}$                 | 2200                                  | $\mu\text{M}\cdot\text{hr}^{-1}$ | 1.01         |
| $R_{vac(\Delta ccc1)}$    | 820 (S2)<br>510 (S1)                  | "                                | 1.00<br>1.01 |
| $R_{vac(CCCI-UP)}$        | 7900 (S2)<br>20,000 <sup>*</sup> (S1) | "                                | 1.00<br>1.00 |
| $R_{vac(CCCI-UP+Ad)}$     | 2200                                  | "                                | 1.00         |
|                           |                                       |                                  |              |
| $R_{cyt}$                 | 410                                   | $\mu\text{M}\cdot\text{hr}^{-1}$ | 1.00         |
|                           |                                       |                                  |              |
| $R_{isu}$                 | 520                                   | $\mu\text{M}\cdot\text{hr}^{-1}$ | 1.00         |
| $R_{isu(\Delta Yfh1)}$    | 15                                    | "                                | 1.03         |
|                           |                                       |                                  |              |
| $k_{23}$                  | 7.3                                   | $\text{hr}^{-1}$                 | 1.00         |
| $k_{23(\Delta ccc1)}$     | 0.74                                  | "                                | 1.00         |
| $k_{23(CCCI-up)}$         | 0.20                                  | "                                | 1.00         |
| $k_{23(CCCI-UP+Ad)}$      | 66                                    | "                                | 1.00         |
|                           |                                       |                                  |              |
| $k_{vp}$                  | 0.02                                  | $\text{hr}^{-1}$                 | 1.00         |
| $k_{vp(\Delta ccc1)}$     | 0.06                                  | "                                | 1.00         |
| $k_{vp(Ccc1-UP)}$         | 0.29                                  | "                                | 1.00         |
| $k_{vp(Ccc1-UP+Ad)}$      | 0.22                                  | "                                | 1.00         |
|                           |                                       |                                  |              |
| $k_{ros}$                 | 0.014                                 | $\mu\text{M}^{-1}\text{hr}^{-1}$ | Fixed        |
| RO2 (aerobic)             | 100                                   | $\mu\text{M}$                    | Fixed        |
| RO2 (anaerobic)           | 1                                     | $\mu\text{M}$                    | Fixed        |
| $\alpha_{\text{health}}$  | 0.20                                  | $\text{hr}^{-1}$                 | Fixed        |
| $\alpha_{\text{disease}}$ | 0.07                                  | $\text{hr}^{-1}$                 | Fixed        |
| $f_{\text{cyt}}$          | 0.65                                  | none                             | Fixed        |
| $f_{\text{mit}}$          | 0.10                                  | none                             | Fixed        |
| $f_{\text{vac}}$          | 0.25                                  | none                             | Fixed        |

## A. Derivation of Product Reg Functions

This derivation assumes that X-S and Fe<sub>cyt</sub> react to generate the Grx:Fe<sub>2</sub>S<sub>2</sub>:Grx homodimer, and that only the apo-form of Grx is active. Following the nomenclature in the text, X-S = FS and Fe<sub>cyt</sub> = C. Also, A = the active form of Aft1/2; inactive forms include AC, AFS and AFSC. We assume that either substrate can bind first and that the binding strength does not change when the other substrate is bound. The dissociation equilibrium expressions for these binding events are...

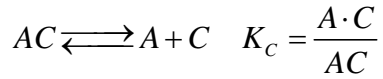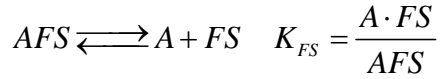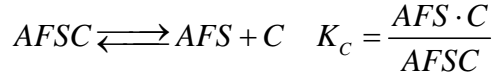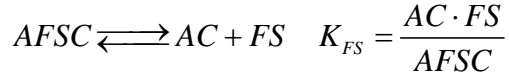

The fraction of A<sub>tot</sub> that is active depends on these binding constants and the concentrations of FS and C, as follows.

$$A_{tot} = A + AFS + AC + AFSC$$

$$A_{tot} = A + \frac{A \cdot FS}{K_{FS}} + \frac{A \cdot C}{K_C} + \frac{AFS \cdot C}{K_C}$$

$$A_{tot} = A + \frac{A \cdot FS}{K_{FS}} + \frac{A \cdot C}{K_C} + \frac{A \cdot C \cdot FS}{K_C \cdot K_{FS}}$$

$$A_{tot} = A \left( 1 + \frac{FS}{K_{FS}} + \frac{C}{K_C} + \frac{C \cdot FS}{K_C \cdot K_{FS}} \right)$$

$$A_{tot} = A \left( 1 + \frac{FS}{K_{FS}} \right) \left( 1 + \frac{C}{K_C} \right)$$

$$\frac{A}{A_{tot}} = \frac{1}{\left( 1 + \frac{FS}{K_{FS}} \right)} \frac{1}{\left( 1 + \frac{C}{K_C} \right)}$$

$$\frac{A}{A_{tot}} = \text{Re } g_{-FS} \cdot \text{Re } g_{-C}$$

## B. Derivation of cellular iron concentrations

Multiply the ODEs associated with each of the 7 Fe-containing species in the model ([2] – [8]) by the fractional volume associated with each species whose concentration-change is described by the ODE. For example, both sides of ODE [2] are multiplied by fractional cytosolic volume ( $V_{\text{cyt}}/V_{\text{cell}}$ ) because the component described by that ODE, namely C, is found in the cytosol. We have...

$$\begin{aligned} \frac{V_{\text{cyt}}}{V_{\text{cell}}} \frac{d[C]}{dt} &= \frac{V_{\text{cyt}}}{V_{\text{cell}}} \frac{R_{\text{cyt}}[N]}{K_{\text{cyt}} + [N]} \text{Reg}_{-C} \cdot \text{Reg}_{-FS} - \frac{V_{\text{mit}}}{V_{\text{cell}}} \frac{R_{\text{mit}}[C]}{K_{\text{mit}} + [C]} \text{Reg}_{-C} \cdot \text{Reg}_{-FS} - \frac{V_{\text{vac}}}{V_{\text{cell}}} \frac{R_{\text{vac}}[C]}{K_{\text{vac}} + [C]} \text{Reg}_{+C} \cdot \text{Reg}_{+FS} - \frac{V_{\text{cyt}}}{V_{\text{cell}}} \alpha[C] \\ \frac{V_{\text{mit}}}{V_{\text{cell}}} \frac{d[FM]}{dt} &= \frac{V_{\text{mit}}}{V_{\text{cell}}} \frac{R_{\text{mit}}[C]}{K_{\text{mit}} + [C]} \text{Reg}_{-C} \cdot \text{Reg}_{-FS} - \frac{V_{\text{mit}}}{V_{\text{cell}}} \frac{R_{\text{isu}}[FM]}{K_{\text{isu}} + [FM]} - \frac{V_{\text{mit}}}{V_{\text{cell}}} k_{\text{mp}}[FM][O_2] - \frac{V_{\text{mit}}}{V_{\text{cell}}} \alpha[FM] \\ \frac{V_{\text{vac}}}{V_{\text{cell}}} \frac{d[F2]}{dt} &= \frac{V_{\text{vac}}}{V_{\text{cell}}} \frac{R_{\text{vac}}[C]}{K_{\text{vac}} + [C]} \text{Reg}_{+C} \cdot \text{Reg}_{+FS} - \frac{V_{\text{vac}}}{V_{\text{cell}}} k_{23}[F2] \text{Reg}_{+C} \cdot \text{Reg}_{+FS} - \frac{V_{\text{vac}}}{V_{\text{cell}}} \alpha[F2] \\ \frac{V_{\text{mit}}}{V_{\text{cell}}} \frac{d[FS]}{dt} &= \frac{V_{\text{mit}}}{V_{\text{cell}}} \frac{R_{\text{isu}}[FM]}{K_{\text{isu}} + [FM]} - \frac{V_{\text{mit}}}{V_{\text{cell}}} \alpha[FS] \\ \frac{V_{\text{mit}}}{V_{\text{cell}}} \frac{d[MP]}{dt} &= \frac{V_{\text{mit}}}{V_{\text{cell}}} k_{\text{mp}}[FM][O_2] - \frac{V_{\text{mit}}}{V_{\text{cell}}} \alpha[MP] \\ \frac{V_{\text{vac}}}{V_{\text{cell}}} \frac{d[F3]}{dt} &= \frac{V_{\text{vac}}}{V_{\text{cell}}} k_{23}[F2] \text{Reg}_{+C} \cdot \text{Reg}_{+FS} - \frac{V_{\text{vac}}}{V_{\text{cell}}} k_{\text{vp}}[F3] - \frac{V_{\text{vac}}}{V_{\text{cell}}} \alpha[F3] \\ \frac{V_{\text{vac}}}{V_{\text{cell}}} \frac{d[VP]}{dt} &= \frac{V_{\text{vac}}}{V_{\text{cell}}} k_{\text{vp}}[F3] - \frac{V_{\text{vac}}}{V_{\text{cell}}} \alpha[VP] \end{aligned}$$

The sum of these terms on the left-hand-side of the ODEs is

$$\frac{V_{\text{cyt}}}{V_{\text{cell}}} \frac{d[C]}{dt} + \frac{V_{\text{mit}}}{V_{\text{cell}}} \frac{d[FM]}{dt} + \frac{V_{\text{mit}}}{V_{\text{cell}}} \frac{d[FS]}{dt} + \frac{V_{\text{mit}}}{V_{\text{cell}}} \frac{d[MP]}{dt} + \frac{V_{\text{vac}}}{V_{\text{cell}}} \frac{d[F2]}{dt} + \frac{V_{\text{vac}}}{V_{\text{cell}}} \frac{d[F3]}{dt} + \frac{V_{\text{vac}}}{V_{\text{cell}}} \frac{d[VP]}{dt}$$

This is identical to the derivative of the overall mass balance equation [1].

$$\frac{d[Fe_{\text{cell}}]}{dt} = \frac{V_{\text{cyt}}}{V_{\text{cell}}} \frac{d[C]}{dt} + \frac{V_{\text{mit}}}{V_{\text{cell}}} \frac{d[FM]}{dt} + \frac{V_{\text{mit}}}{V_{\text{cell}}} \frac{d[FS]}{dt} + \frac{V_{\text{mit}}}{V_{\text{cell}}} \frac{d[MP]}{dt} + \frac{V_{\text{vac}}}{V_{\text{cell}}} \frac{d[F2]}{dt} + \frac{V_{\text{vac}}}{V_{\text{cell}}} \frac{d[F3]}{dt} + \frac{V_{\text{vac}}}{V_{\text{cell}}} \frac{d[VP]}{dt}$$

Indicating that the left-hand-side of the ODEs is equal to  $\frac{d[Fe_{\text{cell}}]}{dt}$ .

The sum of the last terms of the right-hand-side of the ODEs affords

$$-\frac{V_{cyt}}{V_{cell}}\alpha[C]-\frac{V_{mit}}{V_{cell}}\alpha[FM]-\frac{V_{mit}}{V_{cell}}\alpha[FS]-\frac{V_{mit}}{V_{cell}}\alpha[MP]-\frac{V_{vac}}{V_{cell}}\alpha[F2]-\frac{V_{vac}}{V_{cell}}\alpha[F3]-\frac{V_{vac}}{V_{cell}}\alpha[VP]$$

Simplifying yields

$$-\alpha\left(\frac{V_{cyt}}{V_{cell}}[C]+\frac{V_{mit}}{V_{cell}}[FM]+\frac{V_{mit}}{V_{cell}}[FS]+\frac{V_{mit}}{V_{cell}}[MP]+\frac{V_{vac}}{V_{cell}}[F2]+\frac{V_{vac}}{V_{cell}}[F3]+\frac{V_{vac}}{V_{cell}}[VP]\right)$$

The sum of the terms within the parentheses is identical to the right-hand-side of [1], such that we can simply to  $-\alpha \cdot [Fe_{cell}]$ . Most (but not all) of the remaining terms of the summed ODEs cancel, finally yielding the equation

$$\frac{d[Fe_{cell}]}{dt} = \frac{V_{cyt}}{V_{cell}} \frac{R_{cyt} \cdot [N]}{K_{cyt} + [N]} \text{Re } g_{-C} \cdot \text{Re } g_{-FS} - \alpha \cdot [Fe_{cell}]$$
